# Supplementary material for: Multifunctional polyketide synthase genes identified by genomic survey of the symbiotic dinoflagellate, Symbiodinium minutum
Source: PubMed Central journal article supplement (PMC4647583; doi:10.1186/s12864-015-2195-8), 2015-11-14

**Figure S3.** (A) Alignment of KS domains with those of other dinoflagellates and animal PKSs and FASs. Asterisks indicate conserved amino acids required for catalytic activity. (B) Additional *Symbiodinium* and *K. brevis* sequences that are consistent with previous reports.

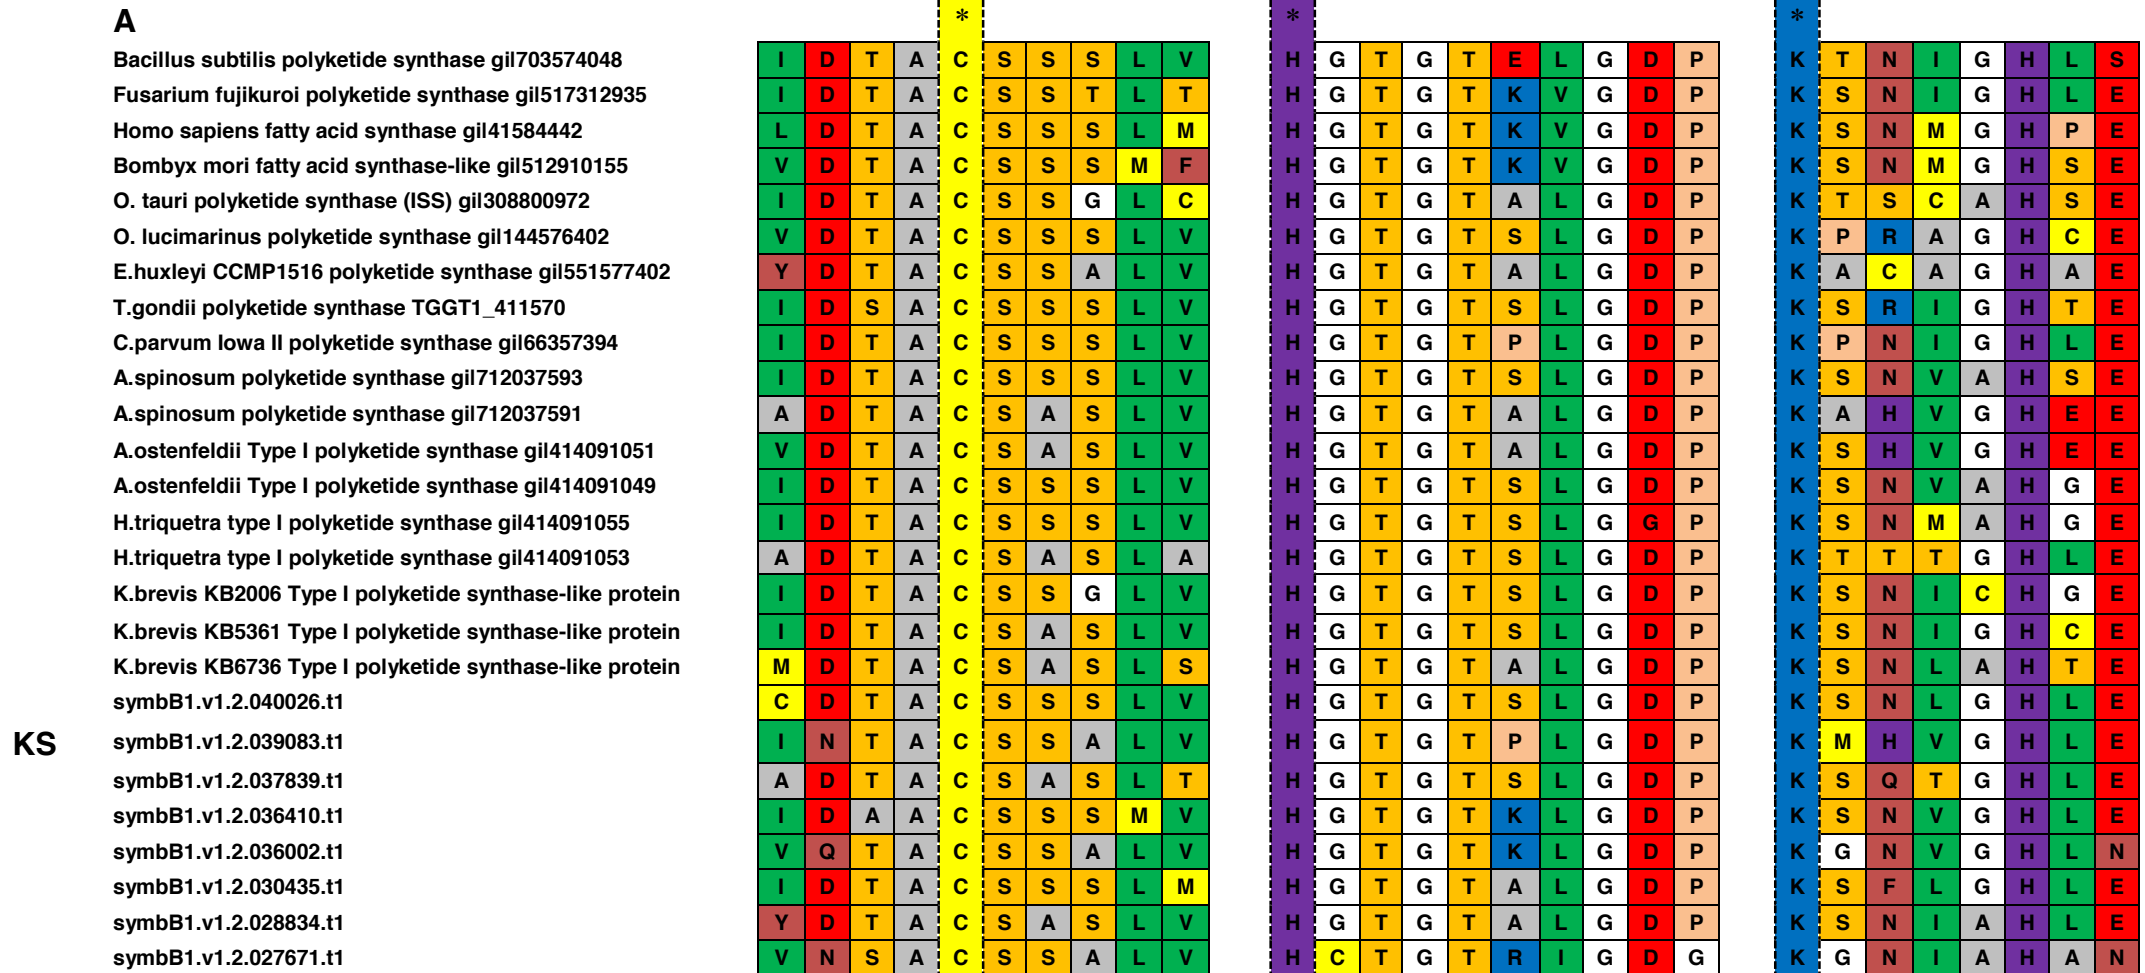

symbB1.v1.2.027279.t1  
 symbB1.v1.2.022565.t1  
 symbB1.v1.2.020241.t1  
 symbB1.v1.2.019160.t1  
 symbB1.v1.2.017689.t1  
 symbB1.v1.2.015790.t1  
 symbB1.v1.2.015789.t1  
 symbB1.v1.2.015788.t2  
 symbB1.v1.2.008782.t1  
 symbB1.v1.2.008781.t1  
 symbB1.v1.2.002919.t1  
 symbB1.v1.2.001307.t1  
 symbB1.v1.2.012436.t1

|   |   |   |   |   |   |   |   |   |   |
|---|---|---|---|---|---|---|---|---|---|
| I | S | S | A | C | S | T | G | A | H |
| I | D | T | A | C | S | A | S | L | V |
| T | E | T | A | C | S | S | S | L | S |
| V | N | T | A | C | S | A | S | L | V |
| C | D | T | A | C | S | A | S | L | T |
| V | D | T | A | C | S | S | A | L | V |
| V | D | T | A | C | S | S | T | I | V |
| M | D | T | A | C | S | S | S | L | V |
| I | D | T | A | C | S | S | T | L | V |
| C | D | T | A | C | S | S | S | L | V |
| L | D | T | A | C | S | S | A | L | V |
| A | E | T | A | C | S | S | S | L | V |
| V | D | T | A | C | S | S | S | L | I |

|   |   |   |   |   |   |   |   |   |   |
|---|---|---|---|---|---|---|---|---|---|
| H | G | T | S | T | P | I | G | D | V |
| H | G | T | G | T | A | L | G | D | P |
| H | G | T | G | T | A | L | G | D | P |
| H | G | T | G | T | S | L | G | D | P |
| H | G | T | G | T | S | L | G | D | P |
| H | G | T | G | T | P | L | G | D | P |
| H | G | T | G | T | A | L | G | D | P |
| H | G | T | G | T | A | L | G | D | P |
| H | G | T | G | T | A | L | G | D | P |
| H | G | T | G | T | A | L | G | D | P |
| H | G | T | G | T | A | L | G | D | P |
| H | G | T | G | T | A | L | G | D | P |
| H | A | T | G | T | W | F | G | D | Q |

|   |   |   |   |   |   |   |   |
|---|---|---|---|---|---|---|---|
| K | S | M | S | G | H | A | L |
| K | S | N | I | G | H | T | E |
| K | S | N | L | G | H | T | E |
| K | P | N | L | G | H | L | E |
| K | S | N | I | G | H | L | E |
| K | S | N | C | G | H | L | E |
| K | S | N | I | G | H | L | E |
| K | T | N | V | G | H | L | E |
| K | S | V | I | A | H | L | E |
| K | T | N | I | A | H | L | E |
| K | S | H | I | G | H | L | E |
| K | T | N | L | G | H | L | E |
| K | S | V | L | G | H | H | E |

**B**

K.brevis KB6380 Type I polyketide synthase-like protein  
 K.brevis KB4825 Type I polyketide synthase-like protein  
 symbB1.v1.2.015913.t1  
 symbB1.v1.2.013880.t1  
 symbB1.v1.2.000535.t1  
 symbB1.v1.2.001928.t1

|   |   |   |   |   |   |   |   |   |   |
|---|---|---|---|---|---|---|---|---|---|
| Y | E | A | D | A | S | S | A | M | V |
| A | A | T | G | A | A | P | S | V | V |
| I | D | T | D | A | S | S | G | A | T |
| I | D | C | D | L | S | S | S | A | M |
| L | D | T | G | C | S | A | S | L | V |
| C | D | T | D | G | S | S | S | L | T |

|   |   |   |   |   |   |   |   |   |   |
|---|---|---|---|---|---|---|---|---|---|
| F | G | D | G | R | F | L | H | E | A |
| S | G | T | G | H | F | F | C | D | A |
| Y | G | A | G | A | F | L | P | D | A |
| H | A | E | G | A | K | L | S | D | S |
| Q | A | N | G | S | L | L | G | D | P |
| N | G | Q | G | S | L | L | R | D | A |

|   |   |   |   |   |   |   |   |
|---|---|---|---|---|---|---|---|
| K | G | S | V | G | D | T | L |
| K | S | N | V | G | N | S | I |
| K | S | S | I | G | N | Q | I |
| K | T | N | T | G | V | Q | R |
| K | C | N | K | G | H | G | E |
| K | S | R | M | G | Y | A | T |

**Figure S4.** Alignments of motifs within AT, ACP, KR, ER and DH domains. Active sites within the motifs are boxed with dashed lines.

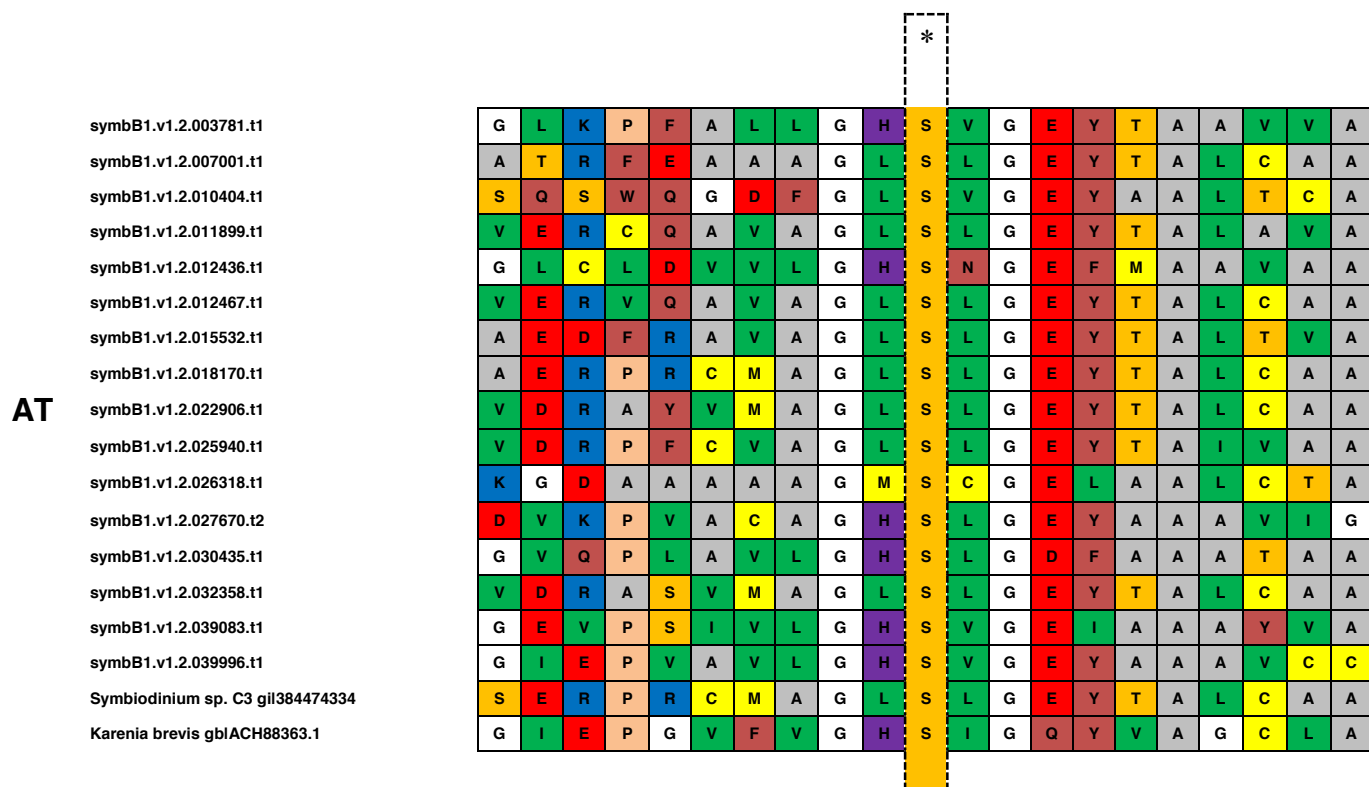

**ACP**  
(PP-binding)

symbB1.v1.2.000534.t1  
 symbB1.v1.2.001762.t1  
 symbB1.v1.2.003781.t1  
 symbB1.v1.2.003989.t1  
 symbB1.v1.2.040551.t1  
 symbB1.v1.2.015786.t1  
 symbB1.v1.2.019479.t1  
 symbB1.v1.2.029496.t1  
 symbB1.v1.2.005063.t1  
 symbB1.v1.2.007443.t3  
 symbB1.v1.2.008326.t1  
 symbB1.v1.2.015788.t1  
 symbB1.v1.2.013531.t1  
 symbB1.v1.2.008780.t1  
 symbB1.v1.2.008781.t1  
 symbB1.v1.2.008782.t1  
 symbB1.v1.2.008784.t1  
 symbB1.v1.2.009497.t1  
 symbB1.v1.2.011469.t1  
 symbB1.v1.2.015740.t1  
 symbB1.v1.2.017853.t1  
 symbB1.v1.2.038311.t1  
 symbB1.v1.2.035007.t1  
 symbB1.v1.2.033167.t1  
 symbB1.v1.2.036002.t1  
 symbB1.v1.2.035491.t1  
 symbB1.v1.2.021709.t1  
 symbB1.v1.2.018367.t1  
 symbB1.v1.2.016135.t1  
 symbB1.v1.2.017506.t2  
 symbB1.v1.2.017743.t1  
 symbB1.v1.2.018635.t1  
 symbB1.v1.2.020351.t1  
 symbB1.v1.2.020352.t1  
 symbB1.v1.2.010769.t1  
 symbB1.v1.2.020642.t1  
 symbB1.v1.2.024742.t1  
 symbB1.v1.2.024849.t1  
 symbB1.v1.2.025182.t1  
 symbB1.v1.2.025887.t1  
 symbB1.v1.2.026958.t1  
 symbB1.v1.2.015789.t1  
 symbB1.v1.2.036576.t1  
 symbB1.v1.2.022094.t3  
 symbB1.v1.2.035340.t1  
 symbB1.v1.2.023189.t1  
 symbB1.v1.2.030674.t3  
 symbB1.v1.2.037879.t1  
 symbB1.v1.2.026959.t1  
 symbB1.v1.2.040289.t1  
 symbB1.v1.2.029823.t1  
 symbB1.v1.2.034871.t1

|   |   |   |   |   |   |   |   |   |   |   |   |   |   |   |   |   |
|---|---|---|---|---|---|---|---|---|---|---|---|---|---|---|---|---|
| P | L | T | E | M | G | L | D | S | L | A | A | A | Q | L | R | N |
| P | L | M | D | A | G | V | D | S | L | M | S | I | E | F | R | S |
| P | L | M | A | A | G | M | D | S | L | S | S | V | E | F | R | N |
| P | L | M | D | A | G | L | D | S | L | S | M | V | E | F | R | N |
| P | L | T | T | A | G | M | D | S | L | S | A | V | E | L | R | R |
| A | L | M | E | S | G | M | D | S | L | S | G | V | E | F | R | N |
| P | F | M | E | A | G | M | D | S | L | S | S | V | S | L | T | S |
| P | L | M | E | A | G | I | D | S | L | S | A | V | E | F | R | S |
| D | L | A | F | I | G | L | D | S | L | Q | A | G | V | L | V | S |
| T | A | L | M | D | G | I | D | S | L | G | S | T | L | V | I | N |
| E | F | L | C | E | N | L | D | S | L | D | L | A | R | L | Q | S |
| P | L | M | E | A | G | I | D | S | L | S | A | V | E | F | R | N |
| P | L | M | E | A | G | M | D | S | L | S | S | V | E | F | R | N |
| P | L | M | E | A | G | L | D | S | L | S | S | V | D | F | R | N |
| P | L | M | E | A | G | M | D | S | L | S | A | V | E | F | R | N |
| P | L | M | D | M | G | L | D | S | L | A | A | V | E | F | R | N |
| P | L | M | E | S | G | M | D | S | L | S | A | V | E | F | R | N |
| A | L | M | D | S | G | M | D | S | L | T | A | V | S | F | R | N |
| P | L | M | E | A | G | L | T | S | N | S | A | I | I | M | R | D |
| P | L | M | D | A | G | L | D | S | L | S | M | V | Q | F | R | N |
| P | L | M | E | S | G | L | D | S | L | S | A | V | A | F | R | N |
| S | L | H | Q | L | G | L | D | S | L | E | L | V | Q | L | R | R |
| E | F | D | E | L | G | L | D | S | L | S | G | V | E | A | S | R |
| A | L | M | D | I | G | L | D | S | L | A | S | V | S | F | R | D |
| R | I | D | I | D | G | L | E | S | L | L | M | K | N | S | A | V |
| A | L | M | D | A | G | L | D | S | L | A | S | V | E | F | Q | R |
| A | L | M | D | S | G | M | D | S | L | T | A | V | S | F | R | N |
| V | L | M | D | S | G | M | D | S | L | T | S | V | A | F | R | N |
| T | L | A | E | L | G | V | D | S | I | S | A | A | P | L | A | D |
| Q | D | G | L | S | G | L | E | S | L | K | V | I | I | L | V | S |
| D | L | N | E | S | G | L | D | S | L | A | A | A | E | L | S | T |
| G | F | F | A | S | G | L | D | S | F | D | M | G | V | I | Q | N |
| T | L | T | E | L | G | A | D | S | L | D | I | V | E | S | V | M |
| T | L | S | E | L | G | A | D | S | L | D | I | V | E | S | V | M |
| N | M | S | F | H | G | L | D | S | L | M | L | G | L | L | L | G |
| A | F | I | D | A | G | M | D | S | L | S | G | V | S | L | V | S |
| A | L | M | D | S | G | I | D | S | L | S | A | T | T | F | I | R |
| T | F | F | D | Y | G | M | D | S | L | E | L | I | R | V | R | R |
| G | F | F | Q | L | G | I | D | S | L | E | M | I | R | V | R | R |
| G | F | F | Q | L | G | I | D | S | L | E | M | I | R | V | K | R |
| P | L | M | D | M | G | L | D | S | L | S | A | M | D | L | Q | R |
| P | L | M | E | M | G | L | D | S | L | A | G | V | E | F | R | R |
| P | F | M | D | A | G | M | D | S | L | S | S | V | A | L | M | S |
| P | L | M | E | S | G | V | D | S | L | A | S | V | E | L | R | T |
| P | L | M | E | A | G | M | D | S | L | S | S | V | Q | L | V | T |
| P | L | M | D | A | G | L | D | S | L | A | A | V | E | F | G | R |
| P | L | M | D | I | G | I | N | S | M | N | A | V | V | F | R | R |
| P | L | M | D | M | G | L | D | S | L | S | A | V | E | F | R | R |
| T | L | L | R | S | G | M | D | S | L | S | G | V | E | F | R | R |
| F | V | H | D | L | G | I | D | S | A | G | M | A | G | L | L | G |
| T | F | E | D | A | G | L | D | S | L | S | L | I | S | L | A | R |
| V | F | V | E | V | G | V | D | S | I | T | A | V | D | L | V | R |

**KR**

symbB1.v1.2.025487.t1  
 symbB1.v1.2.026959.t1  
 symbB1.v1.2.015788.t2  
 symbB1.v1.2.001778.t1  
 symbB1.v1.2.015786.t1  
 symbB1.v1.2.015789.t1  
 symbB1.v1.2.003781.t1  
 symbB1.v1.2.004649.t1  
 symbB1.v1.2.029496.t1  
 symbB1.v1.2.035008.t1  
 symbB1.v1.2.035007.t1  
 symbB1.v1.2.035792.t1  
 symbB1.v1.2.036410.t1  
 symbB1.v1.2.008781.t1  
 symbB1.v1.2.008782.t1  
 symbB1.v1.2.008784.t1  
 symbB1.v1.2.008384.t1  
 symbB1.v1.2.037878.t1  
 symbB1.v1.2.010311.t1  
 symbB1.v1.2.010308.t1  
 symbB1.v1.2.010776.t2  
 symbB1.v1.2.040601.t1  
 symbB1.v1.2.012436.t1  
 symbB1.v1.2.013218.t1  
 symbB1.v1.2.034858.t1  
 Karenia brevis gblACH88363.1

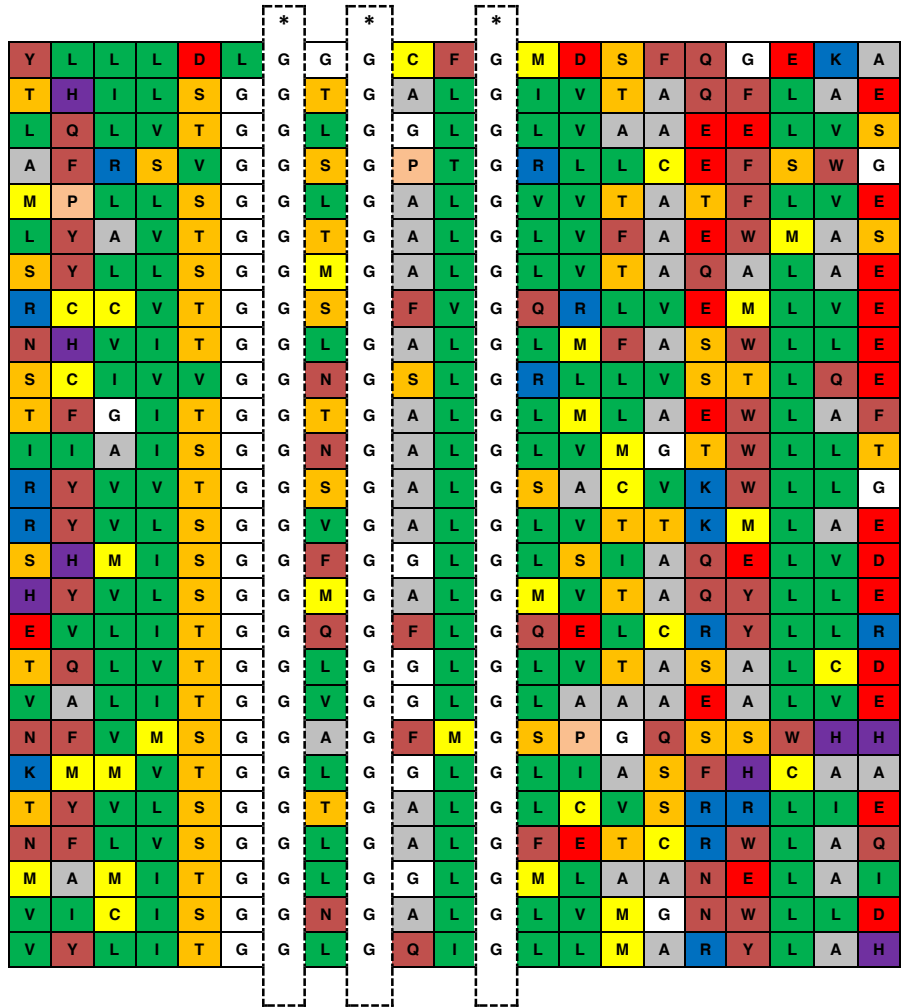

**ER**

symbB1.v1.2.015786.t1  
 symbB1.v1.2.003781.t1  
 symbB1.v1.2.025831.t1  
 symbB1.v1.2.026959.t1  
 symbB1.v1.2.029823.t1  
 symbB1.v1.2.001292.t1  
 symbB1.v1.2.007761.t1  
 symbB1.v1.2.040601.t1  
 symbB1.v1.2.008781.t1  
 symbB1.v1.2.005942.t1  
 Emiliana huxleyi CCMP1516 gii551553589

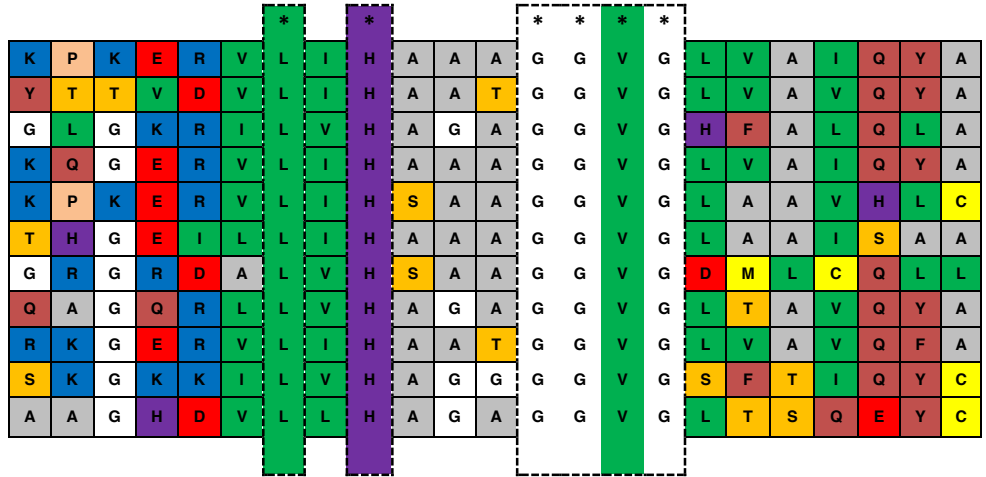

**DH**

symbB1.v1.2.012436.t1  
 Emiliana huxleyi CCMP1516  
 gblEOD11673.1

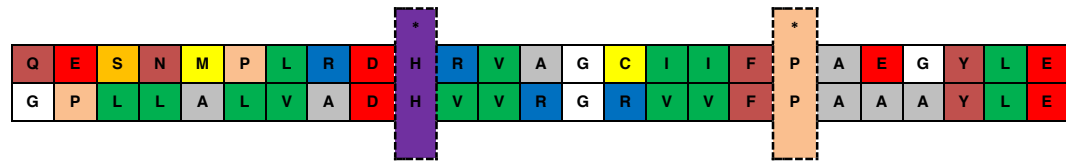

**Figure S5.** (A) Multiple alignment of the truncated, conserved, N-termini of dinoflagellate KSs (B) Additional Symbiodinium sequences with the divergent signatures. Lower panel: Maximum likelihood tree of the N-termini computed with 1000 bootstrap replicates. Bootstrap values  $\geq 50\%$  are marked at appropriate nodes.

**A**

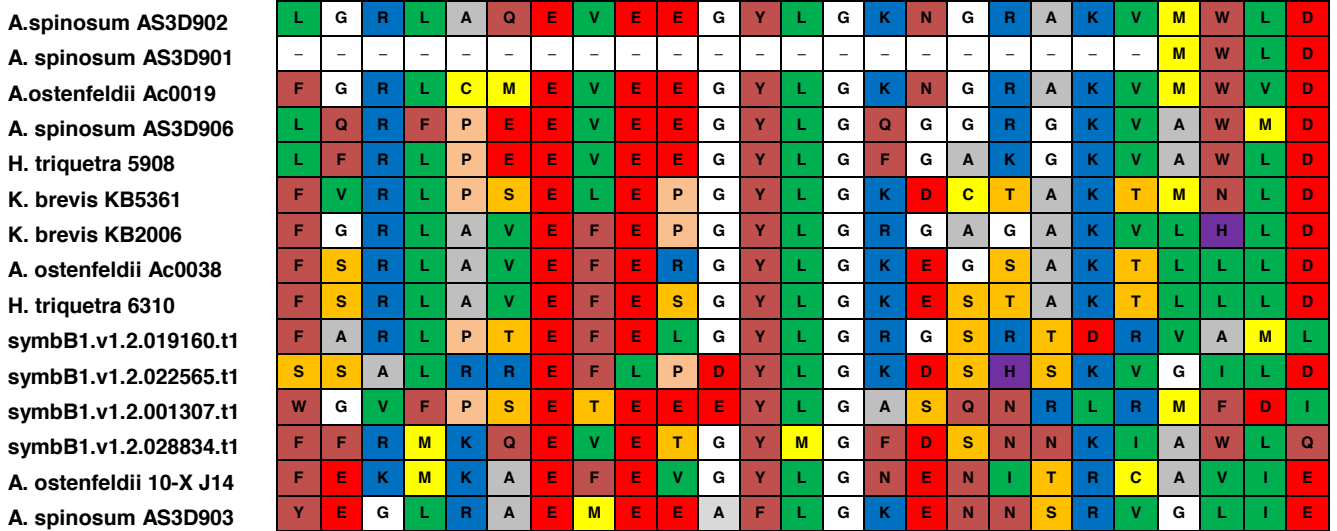

**B**

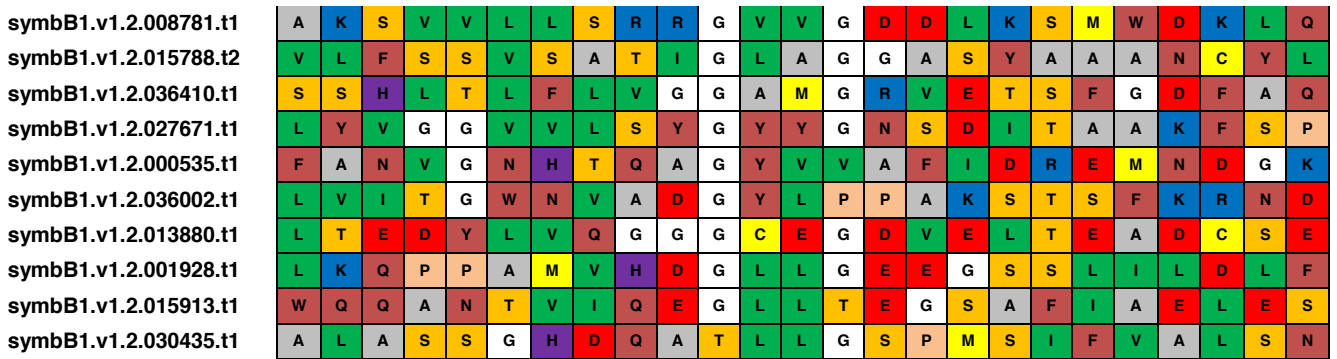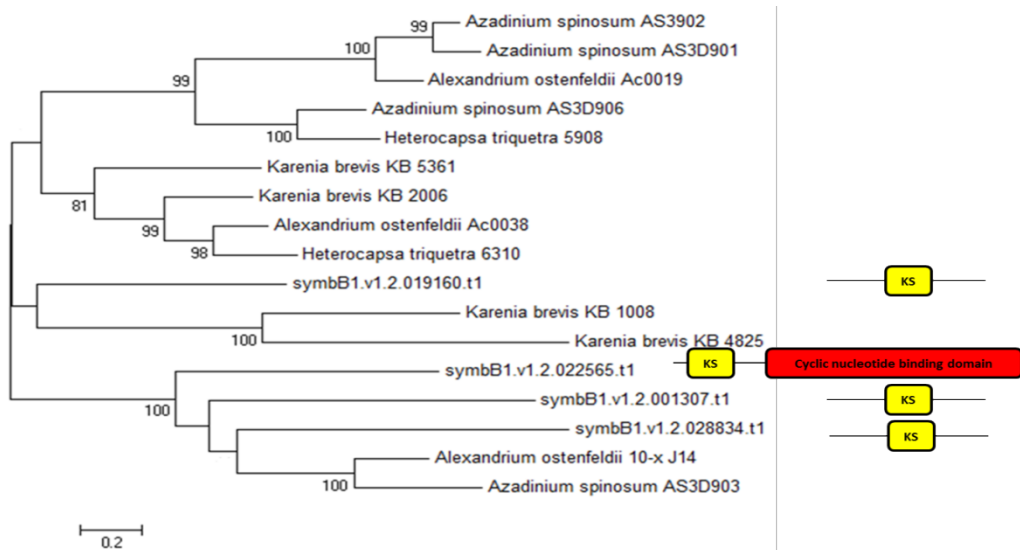

Supplement: 12864_2015_2195_MOESM2_ESM.pdf [file 12864_2015_2195_MOESM2_ESM.pdf]
